# Supplementary material for: Spatial patterns of nitrogen-transforming processes in the Southern Ocean: Potential role of Dissimilatory Nitrate Reduction (DNR)
Source: Research Square preprint supplement (doi:10.21203/rs.3.rs-8021359/v1), 2025-11-25
Supplement: Supplementary file 2 [file 3f856f5d0495d6c5e4185fcb.pdf]

## Spatial patterns of nitrogen-transforming processes in the Southern Ocean: Potential role of Dissimilatory Nitrate Reduction (DNR)

<sup>1</sup>CNRS, Sorbonne Université, Laboratoire d'Océanographie Microbienne, LOMIC, Banyuls-sur-Mer, France.

<sup>2</sup>School of Life Sciences and Medicine, Shandong University of Technology, Zibo, Shandong, 255000 China.

<sup>3</sup>CNRS, Université Brest, IRD, Ifremer, Laboratoire des Sciences de l'environnement marin, Technopôle Brest-Iroise, Plouzané, France.

$\text{NO}_3 \xrightarrow{\text{---}nap,nar\text{---}} \text{NO}_2 \xrightarrow{\text{---}nirS,nirK\text{---}} \text{NO} \xrightarrow{\text{---}nor\text{---}} \text{N}_2\text{O} \xrightarrow{\text{---}nosZ\text{---}} \text{N}_2$   
 (Fe, Mo)                      (Fe, Cu)                      (Fe, Cu)                      (Cu)

$$\text{NO}_3 \xrightarrow[\text{(Fe, Mo)}]{\text{---} \textit{nap, nar} \text{---}} \text{NO}_2 \xrightarrow[\text{(Fe)}]{\text{---} \textit{nirB-nirD, nrf} \text{---}} \text{NH}_4$$
$$\text{NO}_3 \xrightarrow[\text{(Fe, Mo)}]{\text{---nas,nar---}} \text{NO}_2 \xrightarrow[\text{(Fe)}]{\text{---nirA,NR---}} \text{NH}_4$$
$$\text{NH}_3 \xrightarrow[\text{(Cu)}]{\text{---amo---}} \text{NH}_2\text{OH} \xrightarrow[\text{(Fe)}]{\text{---hao---}} \text{NO}_2 \xrightarrow[\text{(Fe, Mo)}]{\text{---nxr---}} \text{NO}_3$$
$$\text{N}_2 \xrightarrow{\text{---nif---}} \text{NH}_3$$

(MoFe, VFe, FeFe)

$$\text{NO}_2 + \text{NH}_4 \xrightarrow{\text{hzs, hdh}} \text{N}_2$$

(Mn, Fe)

**Supplementary Figure. 1** Reactions of N-transforming processes and the corresponding trace metals employed by the metalloenzymes.



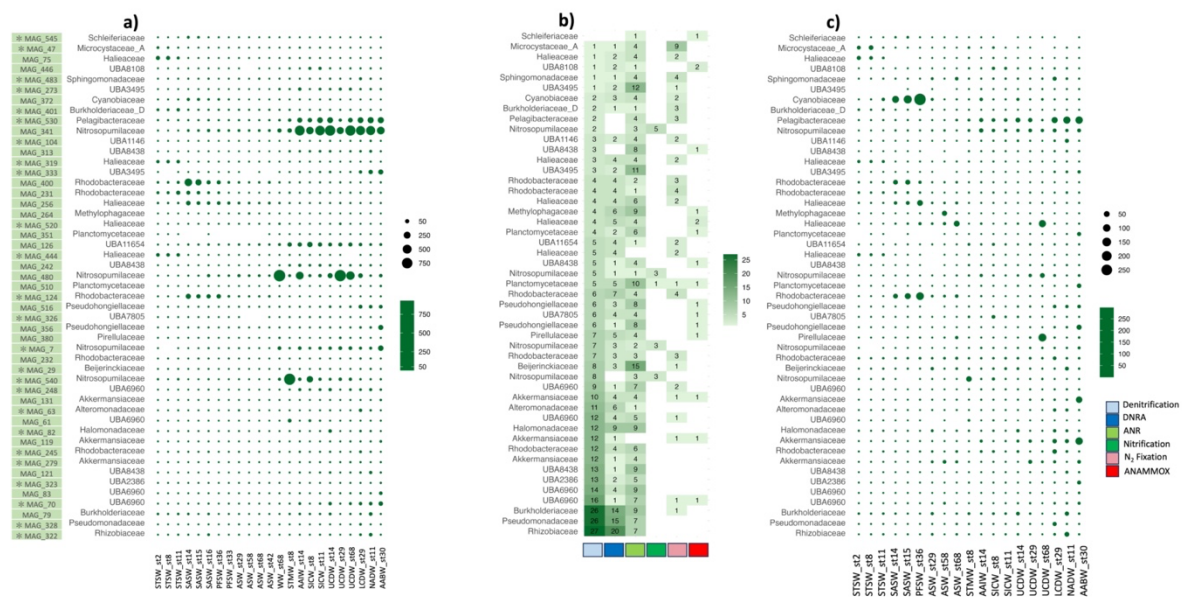

**Supplementary Figure. 4** a) Coverage of representative MAGs in FL communities b) Copy numbers of representative N-transforming genes encoded by the MAGs. c) Coverage of representative MAGs in PA communities. Stars represent the MAGs with species affiliation.

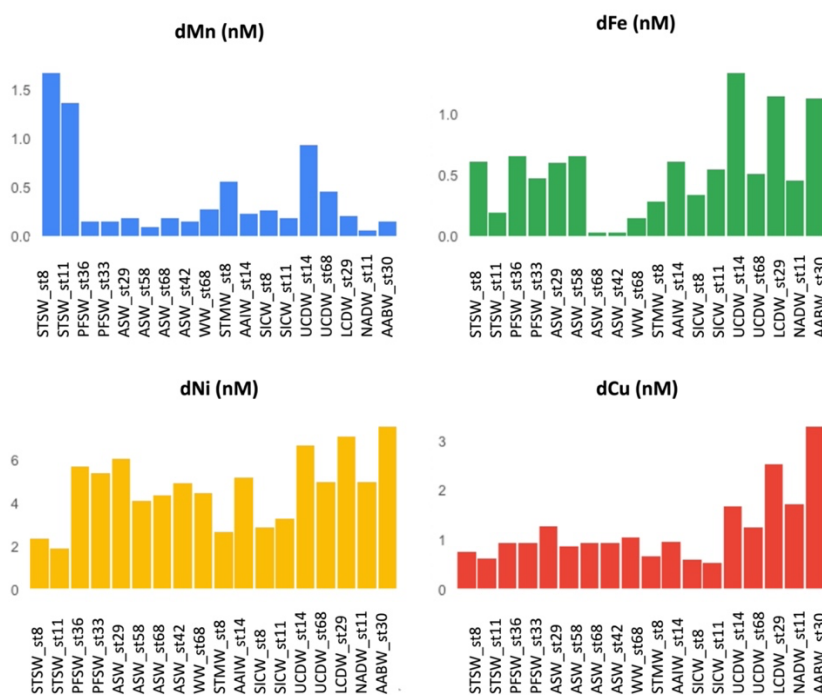

**Supplementary Figure. 5** Dissolved TM concentrations at the depth of sample collection for metagenomic analyses.

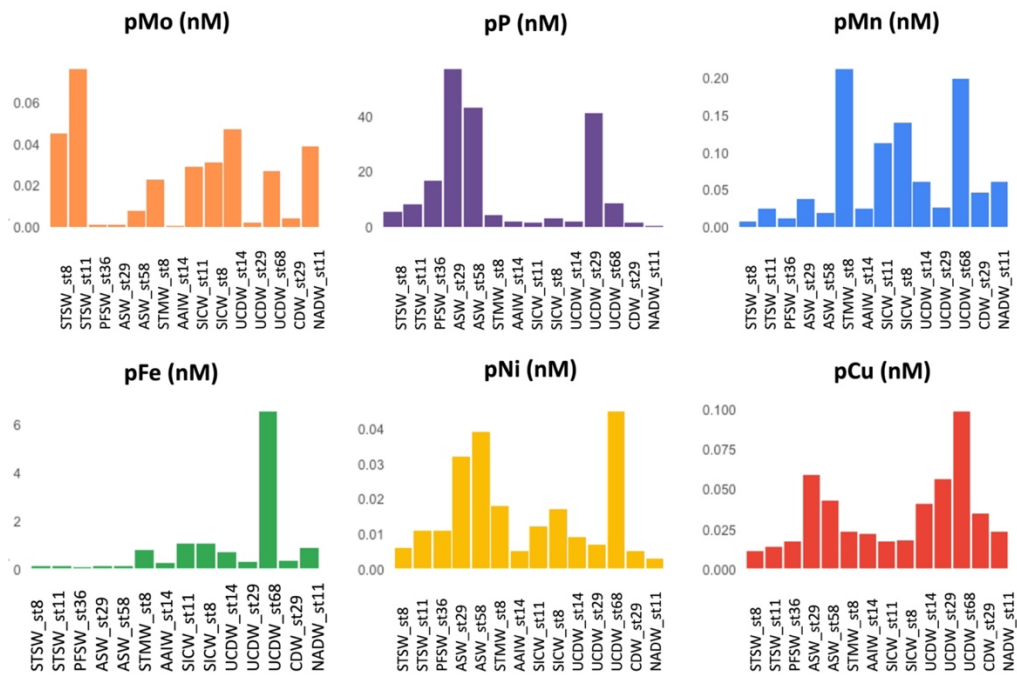

**Supplementary Figure. 6** Particulate TM concentrations at the depth of sample collection for metagenomic analyses.

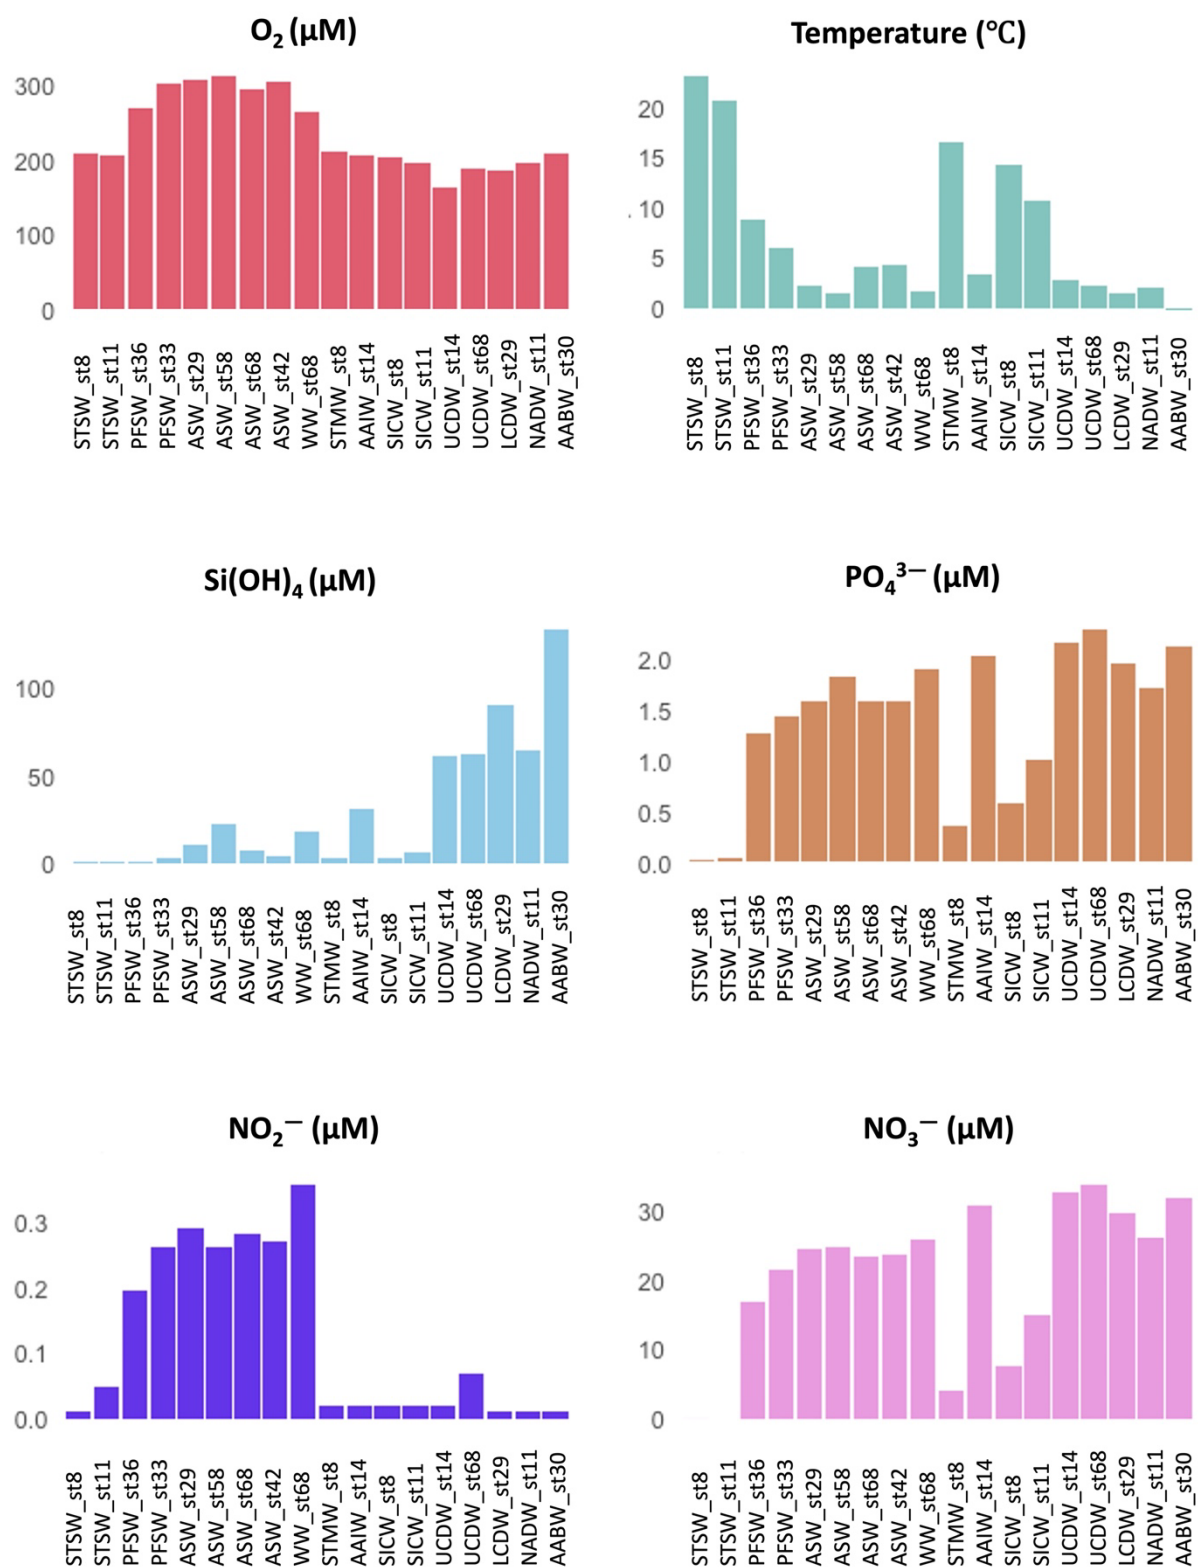

**Supplementary Figure. 7** Physiochemical parameters concentrations, of the samples collected for metagenomic analyses.



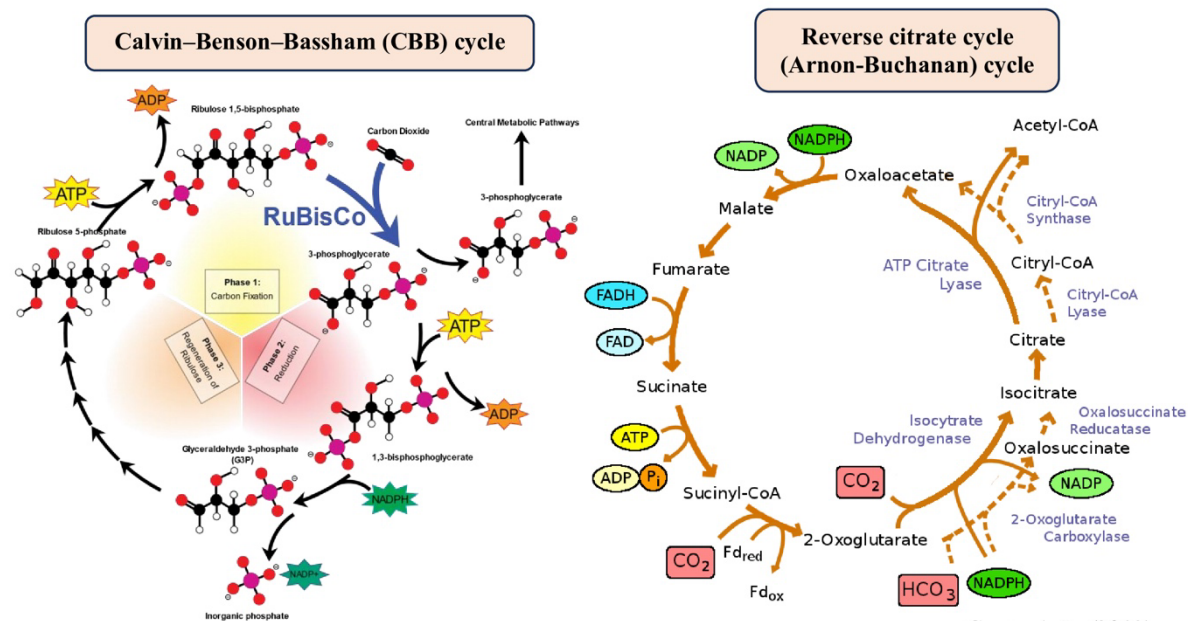

Mike Jones et al., 2010.

Overview of the Calvin cycle and carbon fixation. CC BY-SA 3.0.

A pathway diagram of the reductive TCA cycle. CC BY-SA 3.0.

Wikimedia Commons.

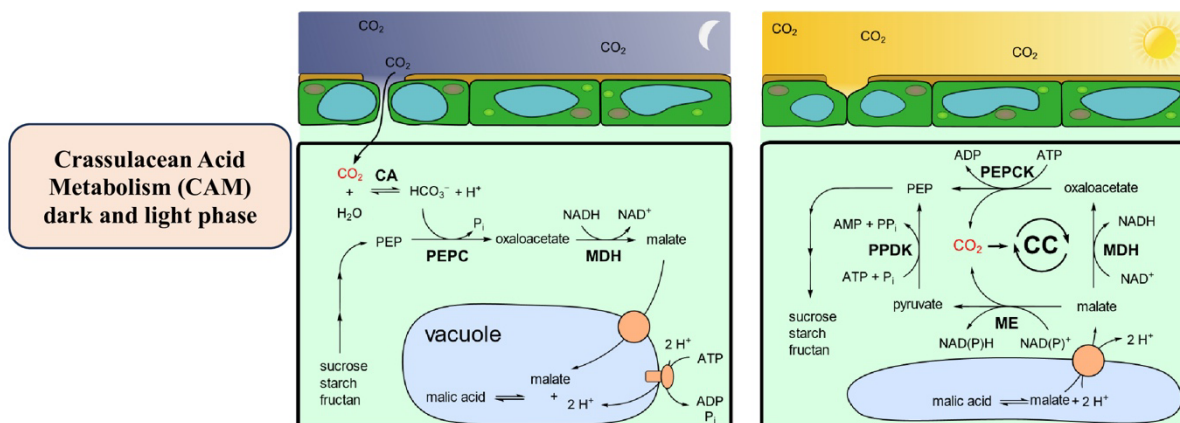

Ed (Edgar181 et al., 2016), based on Yikrazuul. Overview of CAM cycle. Public Domain.

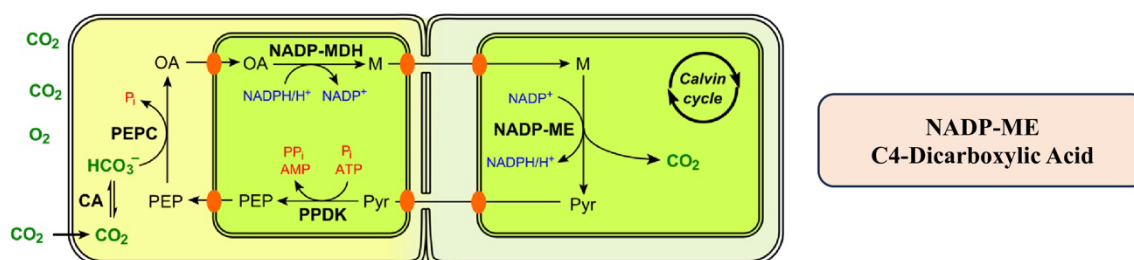

Yikrazuul et al., 2011. Overview of C4 photosynthesis NADP-ME type. CC BY-SA 3.0.

**NADP-ME** - Nicotinamide adenine dinucleotide phosphate- Malic enzyme, **CA** - Carbonic anhydrase,  **$\text{HCO}_3^-$**  - Bicarbonate, **PEP** - phosphoenolpyruvate, **Pi** - phosphate, **PEPC** - PEP carboxylase, **OA** - oxaloacetate, **M** - malate, **Pyr** - pyruvate, **PPDK** - Pyruvate phosphate dikinase, **PPI** - pyrophosphate, **PGA** - phosphoglycerate, **FAD** - Flavin adenine dinucleotide, **CC** - Calvin Cycle

**Supplementary Figure. 8** Inorganic carbon fixing pathways observed/detected in MAGs associated with N-transformations.

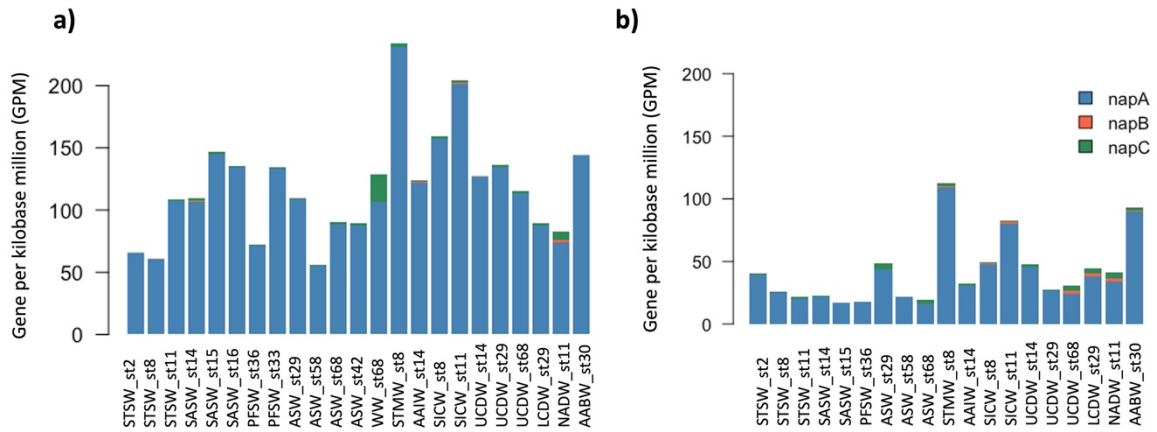

**Supplementary Figure. 9** *nap* gene abundances in the a) free-living and b) particle-attached fractions.

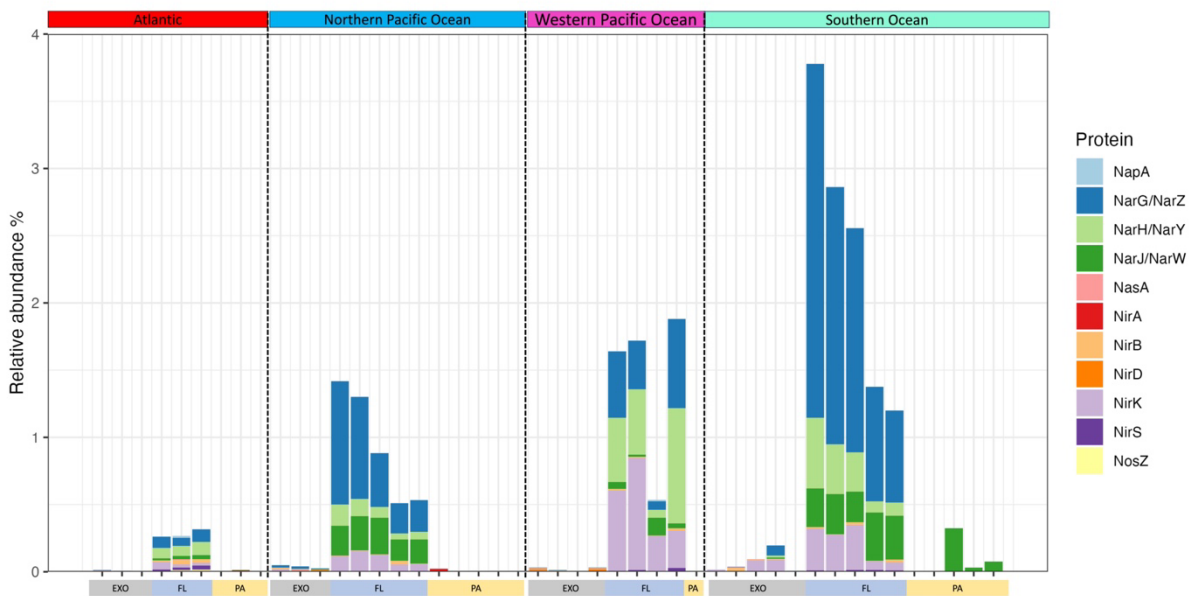

**Supplementary Figure. 10** Metaproteome representing DNR proteins expressed in free-living, particle-attached and exoproteomes of varying oceans. Data from Zhao et al. 2024.

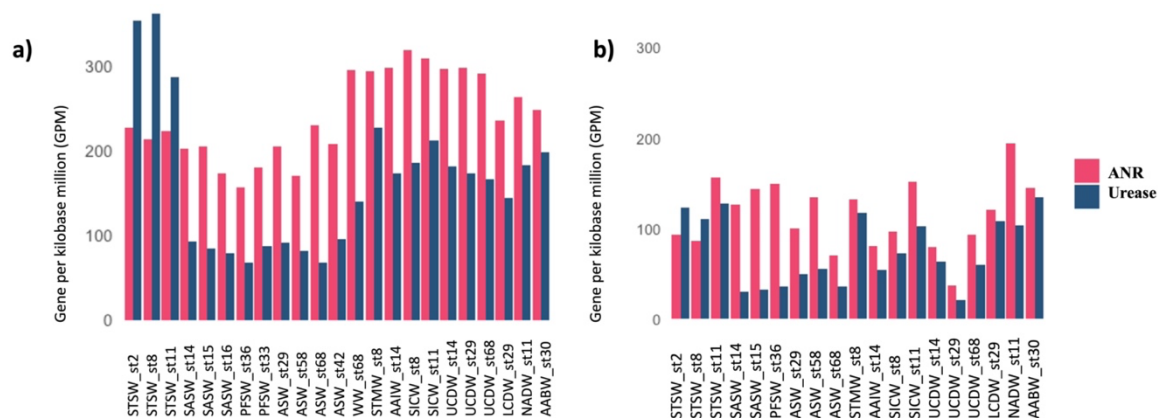

**Supplementary Figure. 11** Urease VS ANR gene abundances **a)** free-living and **b)** particle-attached fractions.

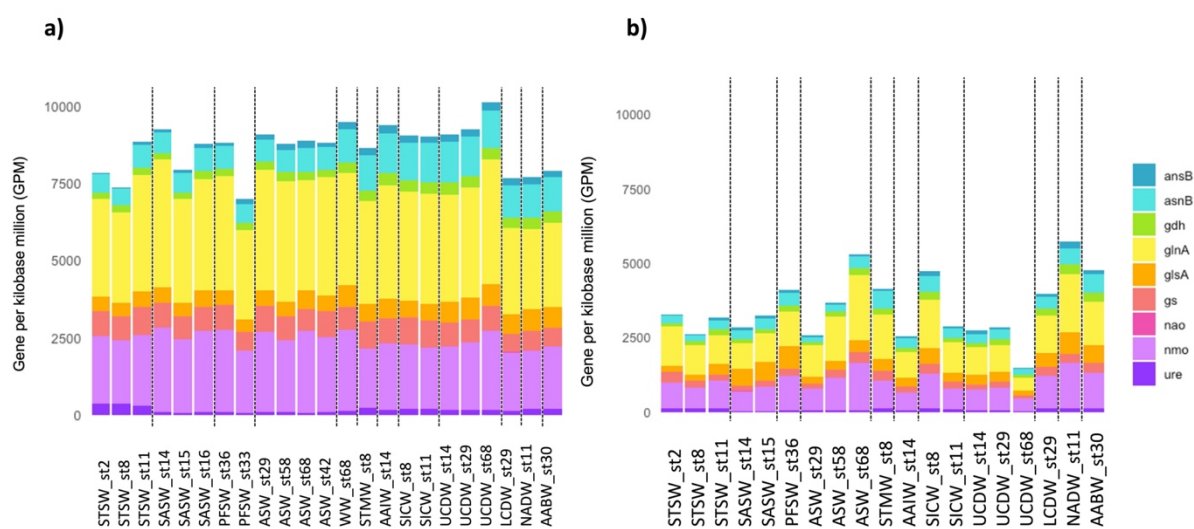

**Supplementary Figure. 12** Organic N compounds synthesis and degradation gene abundances **a)** free-living and **b)** particle-attached fractions.
